# Supplementary material for: Agricultural paraquat dichloride use and Parkinson’s disease in California Central Valley
Source: bioRxiv or medRxiv preprint supplement (doi:10.1101/2022.12.28.22284022), 2022-12-30
Supplement: Supplementary file [file media-1.pdf]

## Supplemental Materials

**Supplemental Table 1. Exposure window information in PEG study (n=1653)**

|                                                      | <b>PD patients<br/>(n=829)</b> |            | <b>Controls<br/>(n=824)</b> |              |
|------------------------------------------------------|--------------------------------|------------|-----------------------------|--------------|
|                                                      | n                              | Mean (SD)  | n                           | Mean<br>(SD) |
| <b>Exposure Window Information</b>                   |                                |            |                             |              |
| Index year                                           | 829                            | 2006 (4.7) | 824                         | 2006 (3.6)   |
| 10 years prior to Index year                         | 829                            | 1996 (4.7) | 824                         | 1996 (3.6)   |
| 20 years prior to Index year                         | 829                            | 1986 (4.7) | 824                         | 1986 (3.6)   |
| <b>Average Years of Exposure Address<br/>History</b> |                                |            |                             |              |
| <b>Residence</b>                                     |                                |            |                             |              |
| 1974-index year                                      | 824                            | 31.3 (5.2) | 820                         | 31.3 (4.0)   |
| 1974-index year with 10-year lag                     | 823                            | 21.6 (4.9) | 819                         | 21.6 (3.8)   |
| 20 years - 10 years prior to index year              | 820                            | 9.8 (0.8)  | 818                         | 9.9 (0.8)    |
| 10 years prior to index year                         | 820                            | 9.8 (0.9)  | 817                         | 9.8 (0.8)    |
| <b>Workplace</b>                                     |                                |            |                             |              |
| 1974-index year                                      | 800                            | 27.1 (9.0) | 781                         | 23.8 (9.1)   |
| 1974-index year with 10-year lag                     | 799                            | 19.7 (6.4) | 781                         | 17.5 (6.5)   |
| 20 years - 10 years prior to index year              | 765                            | 9.2 (1.2)  | 712                         | 8.7 (2.3)    |
| 10 years prior to index year                         | 672                            | 8.8 (2.4)  | 593                         | 8.3 (2.7)    |

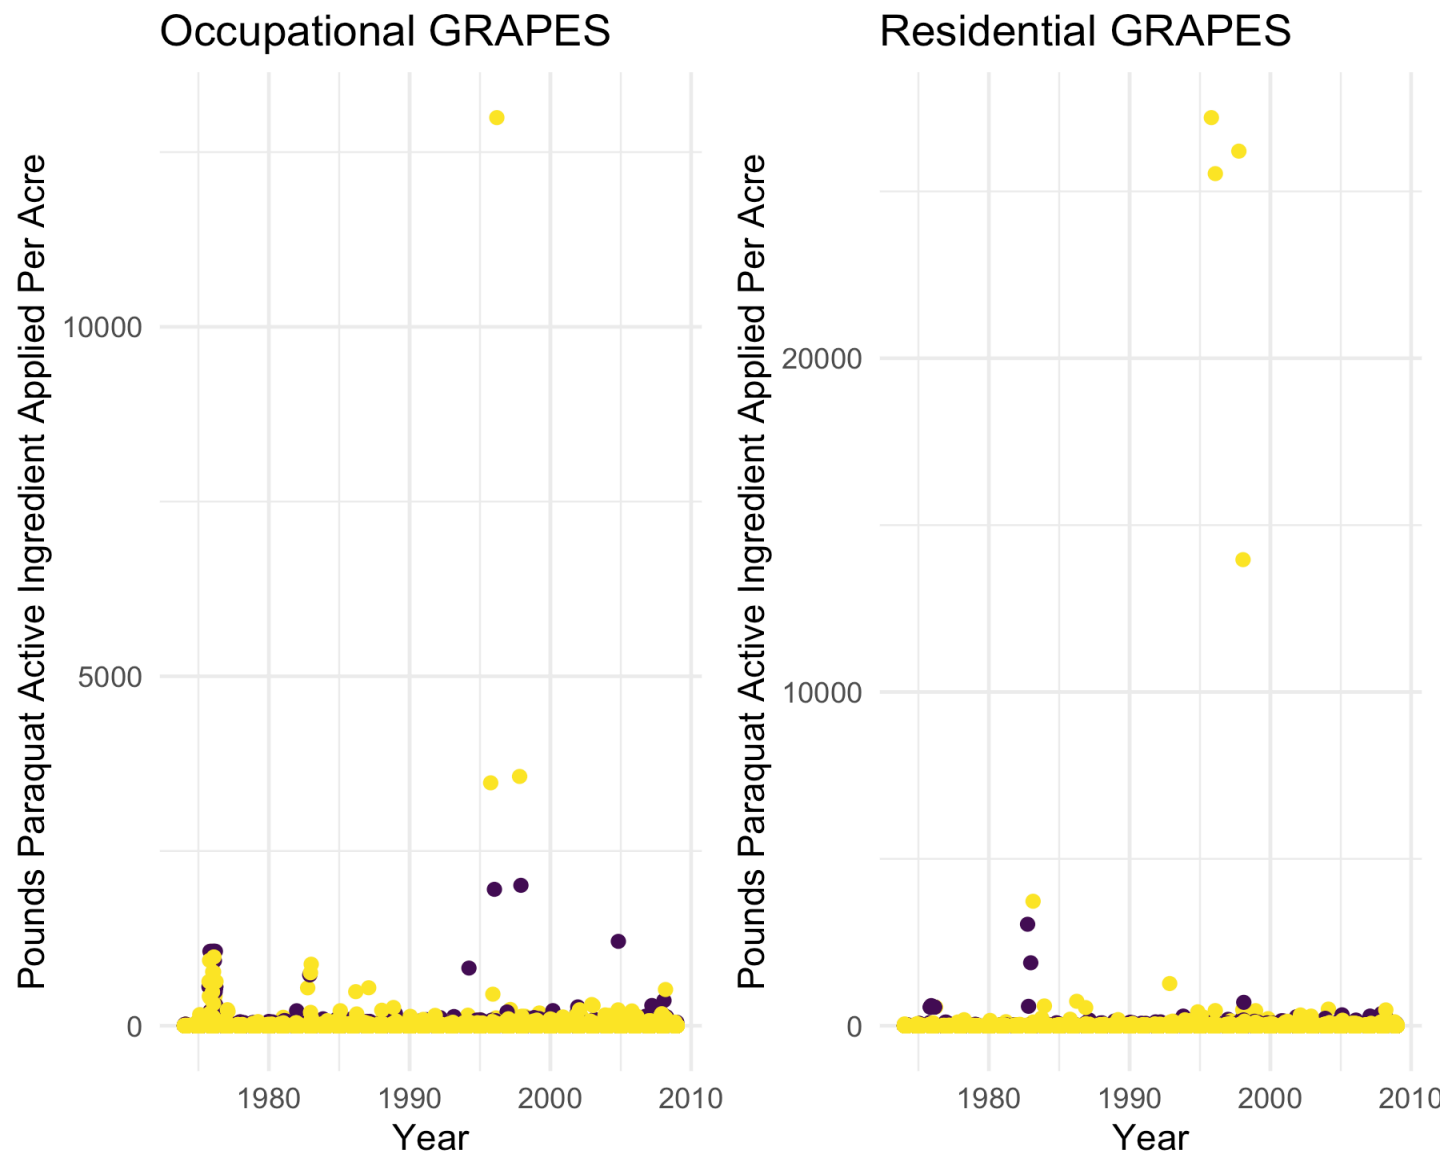

**Supplemental Figure 1.** Plot of all lbs/acre estimates for paraquat across all years and participants. Yellow=patients; purple=controls
